# Supplementary material
Source: PubMed Central journal article supplement (PMC2782421)
Supplement: NIHMS81646-supplement-1.pdf [file NIHMS81646-supplement-1.pdf]

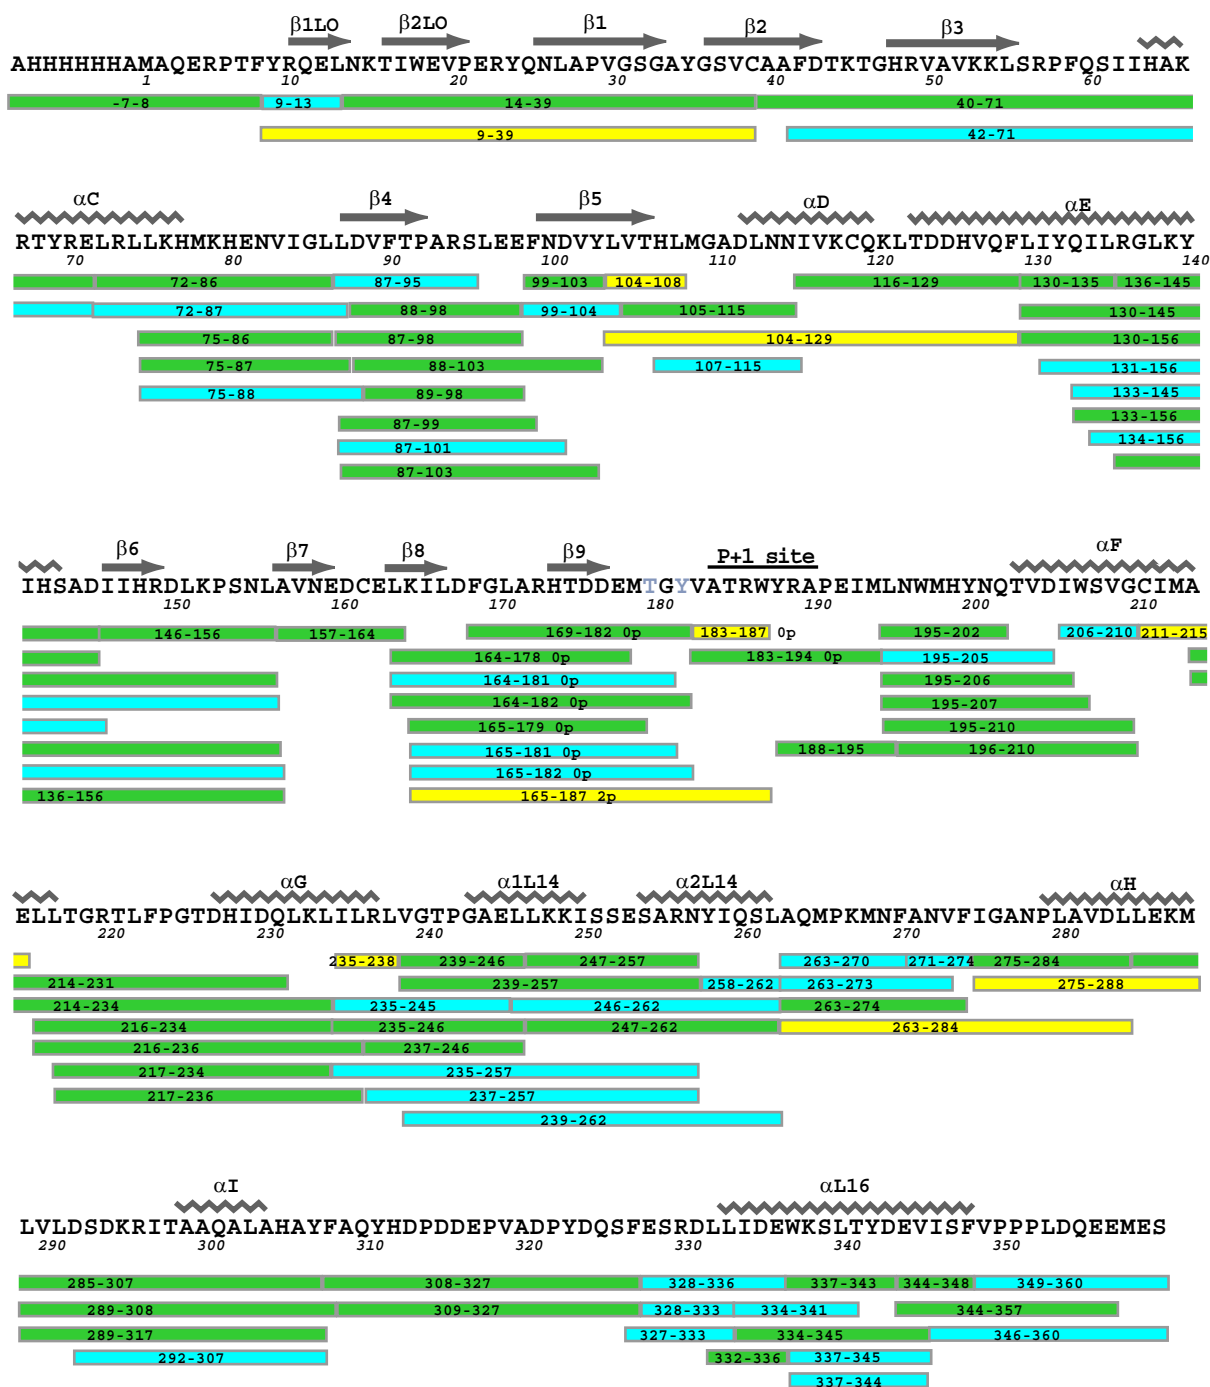

**Suppl. Fig. 1. Peptides recovered by LC-MS/MS.** Green indicates peptides observed in both Pulsar and LTQ-Orbitrap datasets. Cyan indicates peptides observed only in LTQ-Orbitrap datasets. Yellow indicates peptides observed only in Pulsar datasets.

**Suppl. Table 1: Unique peptides observed by LC-MS/MS (Pulsar + LTQ-Orbitrap)**

| Residues # | Sequence                        | Mass    | Calculated m/z, with observed peptide ions indicated in Bold |                |                |               |               |               | Elution Time |
|------------|---------------------------------|---------|--------------------------------------------------------------|----------------|----------------|---------------|---------------|---------------|--------------|
|            |                                 |         | MH+                                                          | 2.00           | 3.00           | 4.00          | 5.00          | 6.00          |              |
| -7.8       | AHHHHHHAMAQERPTF                | 1942.89 | 1943.89                                                      | <b>972.45</b>  | <b>648.63</b>  | <b>486.72</b> |               |               | 6            |
| 9.13       | YRQEL                           | 707.37  | <b>708.37</b>                                                |                |                |               |               |               | 4.4          |
| 9.39       | YRQELNKTIWEVPERYQNLAPVGSGAYGSVC | 3526.74 | 3527.74                                                      | 1764.37        | <b>1176.58</b> | <b>882.69</b> | 706.35        | 588.79        | 11.5         |
| 14.39      | NKTIWEVPERYQNLAPVGSGAYGSVC      | 2837.39 | 2838.39                                                      | 1419.70        | <b>946.80</b>  | <b>710.35</b> | 568.48        | 473.90        | 11.3         |
| 40.71      | AAFDTKTGHRVAVKKLSRPFQSIHAKRTYRE | 3711.07 | 3712.07                                                      | 1856.54        | <b>1238.02</b> | <b>928.77</b> | <b>743.21</b> | 619.51        | 7.7          |
| 42.71      | FDTKTGHRVAVKKLSRPFQSIHAKRTYRE   | 3568.99 | 3569.99                                                      | 1785.50        | <b>1190.66</b> | <b>893.25</b> | <b>714.80</b> | 595.83        | 9.5          |
| 72.86      | LRLMKHMKHENVIGL                 | 1800.06 | 1801.06                                                      | <b>901.03</b>  | <b>601.02</b>  | <b>451.02</b> |               |               | 7.7          |
| 72.87      | LRLMKHMKHENVIGLL                | 1913.15 | 1914.15                                                      | <b>957.58</b>  | <b>638.72</b>  | 479.29        |               |               | 10.3         |
| 75.86      | LKHKHMKHENVIGL                  | 1417.79 | 1418.79                                                      | <b>709.90</b>  | <b>473.60</b>  |               |               |               | 6.4          |
| 75.87      | LKHKHMKHENVIGLL                 | 1530.87 | 1531.87                                                      | <b>766.44</b>  | <b>511.29</b>  |               |               |               | 7.15         |
| 75.88      | LKHKHMKHENVIGLLD                | 1645.90 | 1646.90                                                      | 823.95         | <b>549.63</b>  | 412.47        |               |               | 9            |
| 87.95      | LDVFTPARS                       | 1004.53 | 1005.53                                                      | <b>503.26</b>  |                |               |               |               | 5.6          |
| 87.98      | LDVFTPARSLEE                    | 1375.71 | 1376.71                                                      | <b>688.86</b>  | 459.57         |               |               |               | 8            |
| 87.99      | LDVFTPARSLEEF                   | 1522.77 | 1523.77                                                      | <b>762.39</b>  | 508.59         |               |               |               | 9.8          |
| 87.101     | LDVFTPARSLEEFND                 | 1751.84 | 1752.84                                                      | <b>876.92</b>  | 584.95         | 438.96        |               |               | 9.4          |
| 87.103     | LDVFTPARSLEEFNDVY               | 2013.98 | 2014.98                                                      | <b>1007.99</b> | <b>672.33</b>  | 504.50        | 403.80        |               | 11.5         |
| 88.98      | DVFTPARSLEE                     | 1262.61 | 1263.61                                                      | <b>632.31</b>  | 421.87         |               |               |               | 7.3          |
| 88.103     | DVFTPARSLEEFNDVY                | 1900.88 | 1901.88                                                      | <b>951.44</b>  | 634.63         | 476.22        |               |               | 9.7          |
| 89.98      | VFTPARSLEE                      | 1147.59 | 1148.59                                                      | <b>574.79</b>  |                |               |               |               | 6.35         |
| 99.103     | FNDVY                           | 656.29  | <b>657.29</b>                                                |                |                |               |               |               | 5.9          |
| 99.104     | FNDVYL                          | 769.36  | <b>770.36</b>                                                |                |                |               |               |               | 7.6          |
| 104.108    | LVTHL                           | 581.36  | <b>582.36</b>                                                |                |                |               |               |               | 4.5          |
| 104.129    | LVTHLMGADLNNIVKCQKLTDDHVQF      | 2951.51 | 2952.51                                                      | 1476.76        | <b>984.84</b>  | <b>738.88</b> | <b>591.30</b> | 492.92        | 9.5          |
| 105.115    | VTHLMGADLNN                     | 1183.57 | 1184.57                                                      | <b>592.78</b>  |                |               |               |               | 6            |
| 107.115    | HLMGADLNN                       | 983.46  | <b>984.46</b>                                                | <b>492.73</b>  |                |               |               |               | 4.7          |
| 116.129    | IVKCQKLTDDHVQF                  | 1672.87 | 1673.87                                                      | <b>837.44</b>  | <b>558.62</b>  | 419.22        |               |               | 6.4          |
| 130.135    | LIYQIL                          | 761.48  | <b>762.48</b>                                                |                |                |               |               |               | 8            |
| 130.145    | LIYQILRGLKYIHSAD                | 1902.08 | 1903.08                                                      | <b>952.04</b>  | <b>635.03</b>  | <b>476.52</b> |               |               | 9.7          |
| 130.156    | LIYQILRGLKYIHSADIIHRDLKPSNL     | 3188.83 | 3189.83                                                      | 1595.42        | <b>1063.94</b> | <b>798.21</b> | <b>638.77</b> | <b>532.47</b> | 10.5         |
| 131.156    | IYQILRGLKYIHSADIIHRDLKPSNL      | 3075.73 | 3076.73                                                      | 1538.87        | <b>1026.24</b> | <b>769.93</b> | <b>616.15</b> | 513.62        | 9.25         |
| 133.145    | QILRGLKYIHSAD                   | 1512.84 | 1513.84                                                      | <b>757.42</b>  | <b>505.28</b>  |               |               |               | 6.8          |
| 133.156    | QILRGLKYIHSADIIHRDLKPSNL        | 2799.59 | 2800.59                                                      | 1400.79        | <b>934.20</b>  | <b>700.90</b> | <b>560.92</b> | 467.60        | 8.5          |
| 134.156    | ILRGLKYIHSADIIHRDLKPSNL         | 2671.53 | 2672.53                                                      | 1336.76        | <b>891.51</b>  | <b>668.88</b> | 535.31        | 446.25        | 8.5          |
| 136.145    | RGLKYIHSAD                      | 1158.61 | 1159.61                                                      | <b>580.31</b>  |                |               |               |               | 5.1          |
| 136.156    | RGLKYIHSADIIHRDLKPSNL           | 2445.37 | 2446.37                                                      | 1223.69        | <b>816.12</b>  | <b>612.34</b> | <b>490.07</b> | 408.56        | 8            |

|         |                         |         |               |                |               |               |        |        |  |       |
|---------|-------------------------|---------|---------------|----------------|---------------|---------------|--------|--------|--|-------|
| 146.156 | IIHRDLKPSNL             | 1304.76 | 1305.76       | <b>653.38</b>  | <b>435.92</b> |               |        |        |  | 5.6   |
| 157.164 | AVNEDCEL                | 891.37  | <b>892.37</b> | <b>446.69</b>  |               |               |        |        |  | 8.1   |
| 164.178 | LKILDFGLARHTDDE         | 1741.90 | 1742.90       | 871.95         | <b>581.63</b> | 436.47        |        |        |  | 8.4   |
| 164.181 | LKILDFGLARHTDDEMTG      | 2031.01 | 2032.01       | <b>1016.50</b> | <b>678.00</b> | 508.75        |        |        |  | 8.8   |
| 164.182 | LKILDFGLARHTDDEMTGY     | 2194.07 | 2195.07       | <b>1098.04</b> | <b>732.36</b> | 549.52        | 439.81 |        |  | 9.3   |
| 165.179 | KILDFGLARHTDDEM         | 1759.86 | 1760.86       | 880.93         | <b>587.62</b> | 440.96        |        |        |  | 8.1   |
| 165.181 | KILDFGLARHTDDEMTG       | 1917.91 | 1918.91       | <b>959.96</b>  | <b>640.30</b> | 480.48        |        |        |  | 7.8   |
| 165.182 | KILDFGLARHTDDEMTGY      | 2080.98 | 2081.98       | <b>1041.49</b> | <b>694.66</b> | 521.25        | 417.20 |        |  | 8.4   |
| 165.187 | KILDFGLARHTDDEMTGYVATRW | 2694.32 | 2695.32       | 1348.16        | <b>899.11</b> | <b>674.58</b> | 539.86 | 450.05 |  | 9.9   |
| 165.187 | KILDFGLARHTDDEMTGYVATRW | 2854.26 | 2855.26       | 1428.13        | <b>952.42</b> | <b>714.57</b> | 571.85 | 476.71 |  | 9.1   |
| 169.182 | FGLARHTDDEMTGY          | 1611.70 | 1612.70       | <b>806.85</b>  | 538.23        | 403.92        |        |        |  | 7.5   |
| 183.187 | VATRW                   | 631.33  | <b>632.33</b> |                |               |               |        |        |  | 8     |
| 183.194 | VATRWYRAPEIM            | 1491.49 | 1492.49       | <b>746.74</b>  | <b>498.16</b> |               |        |        |  | 8.5   |
| 188.195 | YRAPEIML                | 991.52  | 992.52        | <b>496.76</b>  |               |               |        |        |  | 8     |
| 195.202 | LNWMHYNQ                | 1104.48 | 1105.48       | <b>553.24</b>  |               |               |        |        |  | 8     |
| 195.205 | LNWMHYNQTVD             | 1419.62 | 1420.62       | <b>710.81</b>  | 474.21        |               |        |        |  | 8.4   |
| 195.206 | LNWMHYNQTVDI            | 1532.72 | 1533.72       | <b>767.36</b>  | <b>511.91</b> |               |        |        |  | 9.1   |
| 195.207 | LNWMHYNQTVDIW           | 1718.79 | 1719.79       | <b>860.39</b>  | 573.93        | 430.70        |        |        |  | 10.4  |
| 195.210 | LNWMHYNQTVDIWSVG        | 1961.91 | 1962.91       | <b>981.95</b>  | <b>654.97</b> | 491.48        |        |        |  | 10.35 |
| 196.210 | NWMHYNQTVDIWSVG         | 1848.83 | 1849.83       | <b>925.41</b>  | 617.28        | 463.21        |        |        |  | 10.4  |
| 206-210 | IWSVG                   | 560.30  | <b>561.30</b> |                |               |               |        |        |  | 6.15  |
| 211-215 | CIMAE                   | 565.23  | <b>566.23</b> |                |               |               |        |        |  | 6.3   |
| 214.231 | AELLTGRTLFPGTDHIDQ      | 1983.01 | 1984.01       | <b>992.50</b>  | <b>662.00</b> | 496.75        |        |        |  | 8.25  |
| 214.234 | AELLTGRTLFPGTDHIDQLKL   | 2337.27 | 2338.27       | <b>1169.63</b> | <b>780.09</b> | <b>585.32</b> | 468.45 |        |  | 9.4   |
| 216.234 | LLTGRTLFPGTDHIDQLKL     | 2137.13 | 2138.13       | <b>1069.57</b> | <b>713.38</b> | <b>535.28</b> | 428.43 |        |  | 11.1  |
| 216.236 | LLTGRTLFPGTDHIDQLKLIL   | 2363.36 | 2364.36       | 1182.68        | <b>788.79</b> | <b>591.84</b> | 473.67 |        |  | 10    |
| 217.234 | LTGRTLFPGTDHIDQLKL      | 2024.11 | 2025.11       | <b>1013.06</b> | <b>675.70</b> | <b>507.03</b> | 405.82 |        |  | 10.5  |
| 217.236 | LTGRTLFPGTDHIDQLKLIL    | 2250.28 | 2251.28       | <b>1126.14</b> | <b>751.09</b> | <b>563.57</b> | 451.06 |        |  | 10.1  |
| 235.238 | ILRL                    | 513.37  | <b>514.37</b> |                |               |               |        |        |  | 5.5   |
| 235.245 | ILRLVGTPGAE             | 1124.66 | 1125.66       | <b>563.33</b>  |               |               |        |        |  | 6.7   |
| 235.246 | ILRLVGTPGAEL            | 1237.74 | 1238.74       | <b>619.87</b>  |               |               |        |        |  | 7.8   |
| 235.257 | ILRLVGTPGAELLKKISSESARN | 2451.42 | 2452.42       | 1226.71        | <b>818.14</b> | <b>613.85</b> | 491.28 | 409.57 |  | 8.9   |
| 237.246 | RLVGTPGAEL              | 1011.57 | 1012.57       | <b>506.79</b>  |               |               |        |        |  | 6.35  |
| 237.257 | RLVGTPGAELLKKISSESARN   | 2225.25 | 2226.25       | 1113.62        | <b>742.75</b> | <b>557.31</b> | 446.05 |        |  | 8.5   |
| 239.246 | VGTPGAEL                | 742.39  | <b>743.39</b> |                |               |               |        |        |  | 4.8   |
| 239.257 | VGTPGAELLKKISSESARN     | 1956.06 | 1957.06       | 979.03         | <b>653.02</b> | 490.02        |        |        |  | 8     |
| 239.262 | VGTPGAELLKKISSESARNYIQL | 2560.39 | 2561.39       | <b>1281.19</b> | <b>854.46</b> | <b>641.10</b> | 513.08 | 427.73 |  | 10.2  |
| 246.262 | LLKKISSESARNYIQL        | 1949.09 | 1950.09       | <b>975.55</b>  | 650.70        | 488.27        |        |        |  | 8.3   |
| 247.257 | LKKISSESARN             | 1231.68 | 1232.68       | <b>616.84</b>  | 411.56        |               |        |        |  | 3.6   |
| 247.262 | LKKISSESARNYIQL         | 1836.02 | 1837.02       | <b>919.01</b>  | <b>613.01</b> | 460.01        |        |        |  | 8     |

|         |                         |         |               |                |               |               |        |        |       |
|---------|-------------------------|---------|---------------|----------------|---------------|---------------|--------|--------|-------|
| 258.262 | YIQSL                   | 622.34  | <b>623.34</b> |                |               |               |        |        | 5.2   |
| 263.270 | AQMPKMNF                | 965.45  | <b>966.45</b> | <b>483.72</b>  |               |               |        |        | 7.5   |
| 263.273 | AQMPKMNFANV             | 1249.59 | 1250.59       | <b>625.80</b>  | 417.53        |               |        |        | 7.95  |
| 263.274 | AQMPKMNFANVF            | 1396.66 | 1397.66       | <b>699.33</b>  | 466.55        |               |        |        | 9.7   |
| 263.284 | AQMPKMNFANVFIGANPLAVDL  | 2360.19 | 2361.19       | <b>1181.10</b> | <b>787.73</b> | 591.05        | 473.04 |        | 11.35 |
| 271.274 | ANVF                    | 449.23  | <b>450.23</b> |                |               |               |        |        | 4.6   |
| 275.284 | IGANPLAVDL              | 981.56  | <b>982.56</b> | <b>491.78</b>  |               |               |        |        | 8.5   |
| 275.288 | IGANPLAVDLLEKM          | 1482.81 | 1483.81       | <b>742.41</b>  | 495.27        |               |        |        | 10.3  |
| 285.307 | LEKMLVLDSDKRITAAQALAHAY | 2556.37 | 2557.37       | 1279.19        | <b>853.12</b> | <b>640.09</b> | 512.27 | 427.06 | 9.1   |
| 289.307 | LVLDSDKRITAAQALAHAY     | 2055.12 | 2056.12       | <b>1028.56</b> | <b>686.04</b> | <b>514.78</b> | 412.02 |        | 10.2  |
| 289.308 | LVLDSDKRITAAQALAHAYF    | 2202.19 | 2203.19       | <b>1102.10</b> | <b>735.06</b> | <b>551.55</b> | 441.44 |        | 11.6  |
| 292.307 | DSDKRITAAQALAHAY        | 1729.87 | 1730.87       | <b>865.94</b>  | <b>577.62</b> | 433.47        |        |        | 7.1   |
| 308.327 | FAQYHDPDDEPVADPYDQSF    | 2354.97 | 2355.97       | <b>1178.49</b> | <b>785.99</b> | 589.74        | 471.99 |        | 8.8   |
| 309.327 | AQYHDPDDEPVADPYDQSF     | 2207.90 | 2208.90       | <b>1104.95</b> | <b>736.97</b> | 552.98        | 442.58 |        | 8.4   |
| 327.333 | FESRDLL                 | 878.45  | <b>879.45</b> | <b>440.22</b>  |               |               |        |        | 6.75  |
| 328.333 | ESRDLL                  | 731.39  | <b>732.39</b> |                |               |               |        |        | 7.3   |
| 328.336 | ESRDLLIDE               | 1088.54 | 1089.54       | <b>545.27</b>  |               |               |        |        | 6.4   |
| 332.336 | LLIDE                   | 601.33  | <b>602.33</b> |                |               |               |        |        | 5.2   |
| 334.341 | IDEWKSLT                | 990.50  | 991.50        | <b>496.25</b>  |               |               |        |        | 7.2   |
| 334.345 | IDEWKSLTYDEV            | 1496.70 | 1497.70       | <b>749.35</b>  | 499.90        |               |        |        | 8.7   |
| 337.343 | WKSLTYD                 | 911.45  | <b>912.45</b> | <b>456.73</b>  |               |               |        |        | 6.8   |
| 337.344 | WKSLTYDE                | 1040.48 | 1041.48       | <b>521.24</b>  |               |               |        |        | 7     |
| 337.345 | WKSLTYDEV               | 1139.55 | 1140.55       | <b>570.77</b>  |               |               |        |        | 7.8   |
| 344.348 | EVISF                   | 593.31  | <b>594.31</b> |                |               |               |        |        | 7     |
| 344.357 | EVISFVPPPLDQEE          | 1597.80 | 1598.80       | <b>799.90</b>  | 533.60        | 400.45        |        |        | 8.5   |
| 346.360 | ISFVPPPLDQEEMES         | 1716.79 | 1717.79       | <b>859.40</b>  | <b>573.26</b> |               |        |        | 8.7   |
| 349.360 | VPPPLDQEEMES            | 1369.61 | 1370.61       | <b>685.80</b>  | 457.54        |               |        |        | 5.9   |

Suppl. Table 2: Kinetic parameters for in-exchange, fit by non-linear least squares.

| Sequence <sup>(1)</sup>                      | Residues | Calc Mass | Obs. m/z | #EA     | % BE | RSS   | A <sup>(2)</sup> | B          | C          | N          | k <sub>1</sub> | k <sub>2</sub> | k <sub>3</sub> |               |
|----------------------------------------------|----------|-----------|----------|---------|------|-------|------------------|------------|------------|------------|----------------|----------------|----------------|---------------|
| AHHHHHHAMAQERPTF                             | 0P       | -7.8      | 1942.89  | 972.45  | 14   | 25.90 | 0.52             | 6.74(.42)  | 0.66(.38)  |            | 7.41(.067)     | 30.05(19.39)   | 1.73(1.34)     |               |
|                                              | 2P       |           |          |         |      |       | 0.61             | 7.07(.16)  | 0.46(.13)  |            | 7.53(.11)      | 15.10(1.38)    | 0.035(.032)    |               |
| YRQEL                                        | 0P       | 9.13      | 707.37   | 708.37  | 4    | 21.20 | 0.44             | 1.58(.22)  | 1.35(.15)  |            | 2.93(.12)      | 22.20(18.88)   | .11(.04)       |               |
|                                              | 2P       |           |          |         |      |       | 1.07             | 1.47(.25)  | 1.41(.21)  |            | 2.90(.16)      | 7.18(2.98)     | 0.085(.047)    |               |
| YRQELNKTIVEVPERYQNLAPVGSYGAYGSVC             | 0P       | 9.39      | 3526.74  | 1176.58 | 28   | 30.30 | 4.57             | 13.19(.81) | 4.62(1.28) | 5.36(1.35) | 23.17(.40)     | 28.44(19.04)   | 0.40(.22)      | 0.030(.017)   |
|                                              | 2P       |           |          |         |      |       | 4.06             | 12.73(.66) | 3.93(.68)  | 7.40(.62)  | 24.06(.40)     | 19.16(4.99)    | 0.51(.23)      | 0.022(.0050)  |
| NKTIWEVPERYQNLAPVGSYGAYGSVC                  | 0P       | 14.39     | 2837.39  | 946.8   | 23   | 31.80 | 2.44             | 10.60(.70) | 1.88(.60)  | 6.76(.50)  | 19.22(.57)     | 14.23(2.69)    | 0.52(.44)      | 0.015(.0051)  |
|                                              | 2P       |           |          |         |      |       | 5.63             | 10.20(.85) | 2.44(.77)  | 6.65(.68)  | 19.28(.74)     | 12.80(3.10)    | 0.50(.44)      | 0.014(.0051)  |
| AAFDTKTGHRVAVKKLSRPFQSIHAKRTYRE              | 0P       | 40.71     | 3711.07  | 928.77  | 30   | 30.10 | 1.92             | 6.62(.74)  | 3.07(.70)  | 2.83(.66)  | 12.52(.25)     | 11.40(2.84)    | 0.62(.35)      | 0.032(.019)   |
|                                              | 2P       |           |          |         |      |       | 2.64             | 4.11(.71)  | 5.71(.64)  | 3.81(.99)  | 13.62(1.12)    | 18.50(13.31)   | 0.92(.20)      | 0.0079(.0052) |
| FDTKTGHRVAVKKLSRPFQSIHAKRTYRE <sup>(7)</sup> | 0P       | 42.71     | 3568.99  | 714.8   | 28   | 31.60 | 3.42             | 7.17(.83)  | 3.20(.79)  | 2.32(.73)  | 12.70(.33)     | 13.62(4.29)    | 0.56(.35)      | 0.030(.023)   |
|                                              | 2P       |           |          |         |      |       | 5.19             | 5.17(.50)  | 4.72(.54)  | 2.52(.51)  | 12.41(.28)     | 13.60          | 0.60           | 0.03          |
| LRLMKHMKHENVIGL                              | 0P       | 72.86     | 1800.06  | 601.02  | 14   | 31.90 | 5.29             |            | 3.53(.37)  |            | 3.53(.22)      |                | 0.56(.18)      |               |
|                                              | 2P       |           |          |         |      |       | 1.00             |            | 1.49(.26)  | 2.27(.25)  | 3.76(.16)      |                | 1.20(.43)      | 0.031(.0098)  |
| LRLMKHMKHENVIGLL                             | 0P       | 72.87     | 1913.15  | 638.72  | 15   | 47.00 | 2.27             |            | 1.34(.46)  | 4.28(.29)  | 5.62(.24)      | 9.42(6.83)     | 0.066(.015)    |               |
|                                              | 2P       |           |          |         |      |       | 1.16             |            | 1.88(.28)  | 3.33(.28)  | 5.14(.22)      |                | 0.56(.18)      | 0.019(.0049)  |
| LKHKHENVIGL                                  | 0P       | 75.86     | 1417.79  | 473.6   | 11   | 29.40 | 1.48             | 1.83(.21)  | 2.20(.19)  |            | 4.03(.22)      | 2.00(.54)      | 0.011(.0036)   |               |
|                                              | 2P       |           |          |         |      |       | 0.67             | 1.29(.18)  | 2.31(.17)  |            | 3.60(.13)      | 1.87(.63)      | 0.033(.0074)   |               |
| LKHKHENVIGLL <sup>(3)</sup>                  | 0P       | 75.87     | 1530.87  | 511.29  | 12   | 26.60 | 0.41             | 1.25(.23)  | 1.66(.31)  | 1.59(.82)  | 4.5            | 13.99(7.41)    | 0.23(.10)      | 0.0066(.0091) |
|                                              | 2P       |           |          |         |      |       | 0.83             | 1.71(.19)  | 2.04(.18)  |            | 3.75(.16)      | 2.02(.52)      | 0.023(.0063)   |               |
| LKHKHENVIGLLD                                | 0P       | 75.88     | 1645.90  | 549.63  | 13   | 16.50 | 0.92             | 1.65(.23)  |            | 2.53(.75)  | 4.19(.78)      | 1.50(.48)      |                | 0.0078(.0049) |
|                                              | 2P       |           |          |         |      |       | 5.52             |            | 3.08(.32)  |            | 3.08(.39)      |                | 0.33(.16)      |               |
| LDVFTPARS                                    | 0P       | 87.95     | 1004.53  | 503.26  | 7    | 25.70 | 6.14             |            | 3.31(.34)  |            | 3.31(.24)      |                | 0.32(.12)      |               |
|                                              | 2P       |           |          |         |      |       | 1.51             | 2.06(.37)  | 1.65(.22)  |            | 3.71(.19)      | 14.89(8.01)    | 0.032(.015)    |               |
| LDVFTPARSLEE                                 | 0P       | 87.98     | 1375.71  | 688.86  | 10   | 13.90 | 0.59             | 3.68(.26)  | 2.48(.54)  | 1.52(.45)  | 7.68(.28)      | 18.20(5.40)    | 0.21(.082)     | 0.016(.016)   |
|                                              | 2P       |           |          |         |      |       | 0.84             | 3.26(.37)  | 1.56(.33)  | 3.18(.24)  | 8.00(.24)      | 18.19(8.64)    | 0.76(.37)      | 0.016(.0040)  |
| LDVFTPARSLEEF                                | 0P       | 87.99     | 1522.77  | 762.39  | 11   | 29.00 | 0.46             | 4.74(.25)  | 2.23(.27)  | 2.27(.24)  | 9.24(.23)      | 24.57(9.76)    | 0.38(.17)      | 0.016(.0075)  |
|                                              | 2P       |           |          |         |      |       | 1.44             | 4.37(.55)  | 1.68(.50)  | 3.14(.32)  | 9.18(.24)      | 13.38(4.53)    | 0.75(.49)      | 0.021(.0063)  |
| LDVFTPARSLEEFND <sup>(7)</sup>               | 0P       | 87.101    | 1751.84  | 876.92  | 13   | 34.90 | 5.18             | 6.45(.71)  | 5.24(.43)  |            | 11.67(.34)     | 13.63(4.20)    | 0.10(.026)     |               |
|                                              | 2P       |           |          |         |      |       | 6.73             | 4.34(.81)  | 3.65(.63)  | 5.26(.67)  | 13.25(.50)     | 13.60          | 1.00           | 0.01          |
| LDVFTPARSLEEFNDVY                            | 0P       | 87.103    | 2013.98  | 1007.99 | 15   | 28.90 | 1.39             | 6.86(.40)  | 3.01(.64)  | 2.65(.62)  | 12.52(.82)     | 17.13(3.76)    | 0.19(.083)     | 0.010(.010)   |
|                                              | 2P       |           |          |         |      |       | 2.14             | 5.68(.75)  | 2.31(.68)  | 4.42(.39)  | 12.41(.41)     | 16.99(7.62)    | 1.10(.57)      | 0.014(.0042)  |
| DVFTPARSLEE                                  | 0P       | 88.98     | 1262.61  | 632.31  | 9    | 27.50 | 0.85             | 3.91(.27)  | 3.60(.16)  |            | 7.51(.14)      | 25.86(15.01)   | 0.078(.011)    |               |
|                                              | 2P       |           |          |         |      |       | 3.08             | 4.17(.35)  | 3.25(.28)  |            | 7.44(.24)      | 10.49(2.55)    | 0.042(.011)    |               |
| DVFTPARSLEEFNDVY                             | 0P       | 88.103    | 1900.88  | 951.44  | 14   | 30.20 | 2.23             | 6.85(.44)  | 5.20(.26)  |            | 12.05(.21)     | 18.57(4.96)    | 0.11(.017)     |               |
|                                              | 2P       |           |          |         |      |       | 2.84             | 5.48(.98)  | 2.42(.90)  | 4.60(.42)  | 12.50(.41)     | 14.70(7.01)    | 1.16(.72)      | 0.016(.0049)  |
| VFTPARSLEE <sup>(7)</sup>                    | 0P       | 89.98     | 1147.59  | 574.79  | 8    | 23.40 | 2.75             | 3.75(.49)  | 3.14(.28)  |            | 6.90(.24)      | 14.8           | 0.11(.032)     |               |
|                                              | 2P       |           |          |         |      |       | 3.85             | 3.37(.40)  | 3.76(.33)  |            | 7.13(.29)      | 14.80(7.04)    | 0.043(.011)    |               |
| FNDVY                                        | 0P       | 99.103    | 656.29   | 657.29  | 4    | 27.60 | 1.50             | 0.83(.11)  |            |            | 0.83(.22)      | 1.24(.75)      |                |               |
|                                              | 2P       |           |          |         |      |       | 0.51             | 0.77(.14)  |            | 0.83(.33)  | 1.60(.35)      | 6.18(2.56)     |                | 0.0088(.0081) |
| FNDVYL                                       | 0P       | 99.104    | 769.36   | 770.36  | 5    | 25.80 | 0.52             | 0.61(.15)  |            |            | 0.61(.058)     | 2.54(1.29)     |                |               |
|                                              | 2P       |           |          |         |      |       | 0.46             | 0.75(0.00) | 0.76(.13)  |            | 0.76(.059)     | 2.16(.85)      |                |               |
| LVTHL                                        | 0P       | 104.108   | 581.36   | 582.36  | 4    | 46.10 | 7.70             | 2.31(.59)  | 1.75(.30)  |            | 4.07(.26)      | 18.69(15.18)   | 0.082(.047)    |               |
|                                              | 2P       |           |          |         |      |       | 4.72             | 2.12(.48)  | 1.71(.35)  |            | 3.77(.22)      | 8.26(4.67)     | 0.14(.092)     |               |
| LVTHLMGADLNNIVKQKLTDDHVQF                    | 0P       | 104.129   | 2951.51  | 984.84  | 25   | 29.40 | 1.22             | 13.13(.76) | 6.03(.67)  | 1.84(.32)  | 20.99(.24)     | 14.98(2.25)    | 1.18(.23)      | 0.022(.015)   |
|                                              | 2P       |           |          |         |      |       | 5.09             | 9.66(1.38) | 8.80(1.27) | 3.28(.62)  | 21.72(.67)     | 12.53(3.98)    | 1.06(.25)      | 0.014(.0087)  |
| VTHLMGADLNN                                  | 0P       | 105.115   | 1183.57  | 592.78  | 10   | 25.80 | 0.47             | 4.68(.41)  | 2.87(.37)  |            | 7.55(.064)     | 18.38(5.60)    | 1.34(.24)      |               |
|                                              | 2P       |           |          |         |      |       | 1.80             | 4.22(.64)  | 3.33(.60)  |            | 7.55(.11)      | 9.78(2.98)     | .72(.23)       |               |
| HLMGADLNN <sup>(3)</sup>                     | 0P       | 107.115   | 983.46   | 492.73  | 8    | 22.60 | 0.46             | 3.84(.37)  | 1.66(.33)  |            | 5.5            | 17.03(5.28)    | 1.10(.33)      |               |
|                                              | 2P       |           |          |         |      |       | 0.74             | 3.03(.32)  | 2.18(.28)  |            | 5.21(.073)     | 11.32(2.99)    | 0.55(.16)      |               |

|                                            |    |         |         |         |    |       |        |            |            |             |             |              |               |                |
|--------------------------------------------|----|---------|---------|---------|----|-------|--------|------------|------------|-------------|-------------|--------------|---------------|----------------|
| IVKQLTDDHVQF                               | OP | 116.129 | 1672.87 | 558.62  | 12 | 29.70 | 0.90   | 6.95(.27)  | 1.77(.17)  |             | 8.74(.15)   | 12.47(1.27)  | 0.053(.016)   |                |
|                                            | 2P |         |         |         |    |       | 2.32   | 6.62(.30)  | 2.12(.27)  |             | 8.76(.25)   | 8.55(1.00)   | 0.025(.0092)  |                |
| LIYQIL <sup>(4)</sup>                      | OP | 130.135 | 761.48  | 762.48  | 5  | 21.30 | No Fit | 0          | 0          | 0           |             |              |               |                |
|                                            | 2P |         |         |         |    |       | No Fit | 0          | 0          | 0           |             |              |               |                |
| LIYQILRGLKYIHSAD                           | OP | 130.145 | 1902.08 | 635.03  | 15 | 31.20 | 0.00   | 0.34(0.0)  |            | 3.21(.0001) | 3.55(.0001) | 1.21(.0002)  |               | 0.0036(0.0)    |
|                                            | 2P |         |         |         |    |       | 0.06   |            |            | 2.69(.81)   | 2.72(.82)   |              |               | .0025(.0010)   |
| LIYQILRGLKYIHSADIIHRDLKPSNL <sup>(3)</sup> | OP | 130.156 | 3188.83 | 798.21  | 25 | 31.30 | 1.76   |            | 0.84(.24)  | 3.04(.19)   | 4.5         | 0.72(.47)    | 0.016(.0036)  |                |
|                                            | 2P |         |         |         |    |       | 2.08   | 1.37(.29)  | 3.54(.45)  |             | 4.93(.48)   | 3.26(1.65)   | 0.016(.0056)  |                |
| IYQILRGLKYIHSADIIHRDLKPSNL <sup>(3)</sup>  | OP | 131.156 | 3075.73 | 769.93  | 24 | 29.80 | 7.45   |            | 2.67(.42)  |             | 2.67(.27)   |              | 0.45(.23)     |                |
|                                            | 2P |         |         |         |    |       | 1.23   | 1.16(.27)  | 3.34(.77)  |             | 4.5         | 1.91(1.08)   | 0.015(.0088)  |                |
| QILRGLKYIHSAD                              | OP | 133.145 | 1512.84 | 757.42  | 12 | 25.70 | 2.12   |            | 1.39(.18)  |             | 1.39(.21)   |              | 0.19(.099)    |                |
|                                            | 2P |         |         |         |    |       | 1.06   |            | 1.29(.15)  |             |             |              | 0.014(.0056)  |                |
| QILRGLKYIHSADIIHRDLKPSNL <sup>(3)</sup>    | OP | 133.156 | 2799.59 | 934.2   | 22 | 30.20 | 0.62   | 1.17(.24)  | 3.29(.26)  |             | 4.47(.26)   | 14.31(8.80)  | 0.033(.0065)  |                |
|                                            | 2P |         |         |         |    |       | 1.07   | 1.31(.23)  | 2.69(.53)  |             | 4           | 1.90(.77)    | 0.018(.0085)  |                |
| ILRGLKYIHSADIIHRDLKPSNL                    | OP | 134.156 | 2671.53 | 891.51  | 21 | 28.60 | 0.52   | 1.34(.21)  | 3.46(.18)  |             | 4.80(.18)   | 13.15(5.65)  | 0.017(.0032)  |                |
|                                            | 2P |         |         |         |    |       | 0.95   | 0.98(.20)  | 3.38(.24)  |             | 4.36(.24)   | 7.57(3.94)   | 0.016(.0034)  |                |
| RGLKYIHSAD                                 | OP | 136.145 | 1158.61 | 580.31  | 9  | 28.20 | 4.12   | 1.58(.42)  |            |             | 1.58(.13)   | 3.23(1.57)   |               |                |
|                                            | 2P |         |         |         |    |       | 1.37   |            |            | 3.57(2.41)  | 3.73(2.43)  |              |               | 0.0034(.0034)  |
| RGLKYIHSADIIHRDLKPSNL                      | OP | 136.156 | 2445.37 | 816.12  | 19 | 29.50 | 7.23   |            | 3.15(.54)  |             | 3.15(.35)   |              | 0.75(.34)     |                |
|                                            | 2P |         |         |         |    |       | 0.68   | 1.35(.18)  |            | 4.36(2.20)  | 5.70(2.29)  | 1.39(.42)    |               | 0.0072(.0059)  |
| IIHRDLKPSNL <sup>(3)</sup>                 | OP | 146.156 | 1304.76 | 435.92  | 9  | 31.20 | 2.51   | 1.30(.29)  |            | 1.38(.17)   | 3.5         | 1.94(.90)    | 0.0063(.0029) |                |
|                                            | 2P |         |         |         |    |       | 0.85   | 1.38(.16)  |            | 1.59(.077)  | 3.0         | 4.97(1.37)   | 0.0054(.0012) |                |
| AVNEDCEL <sup>(3)</sup>                    | OP | 157.164 | 891.37  | 892.37  | 7  | 30.10 | 0.13   | 1.18(.11)  | 1.57(.084) | 4.25(.082)  | 7.0         | 27.39(26.44) | 0.27(.046)    | 0.0033(.00018) |
|                                            | 2P |         |         |         |    |       | 0.34   | 1.16(.12)  | 1.39(.099) | 2.45(.081)  | 5.0         | 24.42(23.91) | 0.30(.071)    | 0.0048(.00039) |
| LKILDFGLARHTDDE <sup>(5)</sup>             | OP | 164.178 | 1741.90 | 581.63  | 14 | 30.80 | 1.54   | 5.69(.40)  | 1.50(.24)  |             | 7.19(.17)   | 22.98(10.50) | 0.25(.13)     |                |
| LKILDFGLARHTDDEMTG <sup>(5)</sup>          | OP | 164.181 | 2031.01 | 1016.5  | 17 | 28.40 | 1.29   | 9.39(.43)  | 1.09(.31)  |             | 10.47(.12)  | 23.87(7.64)  | 0.55(.40)     |                |
| LKILDFGLARHTDDEMTGY <sup>(3,5)</sup>       | OP | 164.182 | 2194.07 | 732.36  | 18 | 29.30 | 2.26   | 11.52(.40) |            | 0.96(.12)   | 12.5        | 17.07(2.16)  |               | 0.0033(.0025)  |
| KILDFGLARHTDDEM <sup>(5)</sup>             | OP | 173.179 | 1759.86 | 587.62  | 14 | 26.70 | 0.45   | 7.39(.22)  | 0.40(.13)  |             | 7.78(.092)  | 32.14(15.45) | 0.21(.19)     |                |
| KILDFGLARHTDDEMTG <sup>(5)</sup>           | OP | 173.181 | 1917.91 | 959.96  | 16 | 28.20 | 0.77   | 9.26(.31)  | 0.84(.20)  |             | 10.09(.094) | 23.83(5.48)  | 0.44(.31)     |                |
| KILDFGLARHTDDEMTGY <sup>(5)</sup>          | OP | 173.182 | 2080.98 | 1041.49 | 17 | 28.20 | 0.80   | 10.04(.39) | 0.79(.31)  |             | 10.84(.094) | 28.85(11.86) | 0.94(.69)     |                |
| KILDFGLARHTDDEMTGYVATRW <sup>(6)</sup>     | OP | 173.187 | 2694.32 |         |    |       | 1.73   | 15.11(.39) | 0.86(.23)  |             | 15.97(.18)  | 25.02(5.06)  | 0.14(.12)     |                |
| KILDFGLARHTDDEMTGYVATRW <sup>(6)</sup>     | 2P | 173.187 | 2854.26 | 952.42  | 22 | 28.70 | 3.74   | 13.86(.37) | 1.58(.35)  |             | 15.44(.33)  | 12.74(1.18)  | 0.023(.015)   |                |
| FGLARHTDDEMTGY <sup>(5)</sup>              | OP | 169.182 | 1611.70 | 806.85  | 13 | 26.60 | 1.09   | 7.74(.27)  |            |             | 7.74(.065)  | 25.45(7.01)  |               |                |
| VATRW <sup>(5)</sup>                       | OP | 183.187 | 1494.64 | 632.33  | 4  | 36.30 | 0.74   | 4.88(.21)  |            |             | 4.88(.049)  | 24.75(7.81)  |               |                |
| VATRWYRAPEIM <sup>(5)</sup>                | OP | 183.194 | 631.33  | 498.16  | 10 | 30.30 | 1.37   | 4.41(.35)  | 6.13(.22)  |             | 10.55(.18)  | 14.39(3.31)  | 0.066(.0068)  |                |
| YRAPEIML <sup>(3)</sup>                    | OP | 188.195 | 1491.49 | 496.76  | 6  | 29.60 | 0.61   | 1.97(.25)  | 2.36(.47)  | 1.61(.51)   | 6.0         | 5.74(1.46)   | 0.14(.052)    | 0.012(.0051)   |
|                                            | 2P |         |         |         |    |       | 1.27   | 2.22(.21)  |            | 2.60(.16)   | 5.0         | 1.11(.24)    |               | 0.011(.002)    |
| LNWMHYNQ <sup>(3)</sup>                    | OP | 195.202 | 991.52  | 553.24  | 7  | 27.10 | 1.85   | 6.50(3.51) |            | 1.34(.11)   | 7.0         | 24.35(11.77) |               | 0.0021(.0014)  |
|                                            | 2P |         |         |         |    |       | 1.68   | 5.74(.26)  |            | 1.26(.11)   | 7.0         | 13.84(2.33)  |               | 0.0027(.0015)  |
| LNWMHYNQTV <sup>(3)</sup>                  | OP | 195.205 | 1104.48 | 710.81  | 10 | 31.00 | 0.49   | 5.16(.25)  | 1.61(.17)  | 1.22(.14)   | 8.0         | 22.25(6.42)  | 0.38(.13)     | 0.0050(.0016)  |
|                                            | 2P |         |         |         |    |       | 0.66   | 5.07(.22)  | 1.41(.19)  | 1.69(.14)   | 8.0         | 15.33(2.59)  | 0.35(.15)     | 0.0060(.0014)  |
| LNWMHYNQTV <sup>(3)</sup>                  | OP | 195.206 | 1419.62 | 767.36  | 11 | 30.20 | 0.71   | 5.76(.35)  | 1.35(.29)  | 1.29(.29)   | 8.39(.35)   | 26.21(13.54) | 0.58(.32)     | 0.013(.013)    |
|                                            | 2P |         |         |         |    |       | 1.06   | 5.35(.35)  | 1.46(.31)  | 1.89(.71)   | 8.7         | 14.89(3.49)  | 0.49(.30)     | 0.0074(.0071)  |
| LNWMHYNQTV <sup>(3)</sup>                  | OP | 195.207 | 1532.72 | 860.39  | 12 | 33.10 | 2.80   | 6.63(.50)  | 1.93(.35)  |             | 8.57(.31)   | 14.82(3.49)  | 0.068(.035)   |                |
|                                            | 2P |         |         |         |    |       | 4.68   | 6.59(.47)  | 2.32(.37)  |             | 8.92(.31)   | 11.19(2.43)  | 0.046(.023)   |                |
| LNWMHYNQTV <sup>(3)</sup>                  | OP | 195.210 | 1718.79 | 981.95  | 15 | 30.10 | 4.83   | 6.52(.59)  |            | 3.48(.18)   | 10.0        | 13.90(3.52)  |               | 0.0051(.0014)  |
|                                            | 2P |         |         |         |    |       | 4.51   | 6.14(.41)  | 2.21(.38)  |             | 8.36(.36)   | 9.20(1.67)   | 0.023(.012)   |                |
| NWMHYNQTV <sup>(3)</sup>                   | OP | 196.210 | 1961.91 | 925.41  | 14 | 30.10 | 1.34   | 4.13(.60)  | 1.04(.49)  | 1.84(.19)   | 7.0         | 17.99(9.49)  | 0.92(.83)     | 0.0077(.0025)  |
|                                            | 2P |         |         |         |    |       | 0.81   | 3.76(.41)  | 1.20(.36)  | 1.84(.74)   | 6.79(.82)   | 20.97(11.88) | 0.77(.49)     | 0.0069(.0064)  |
| IWSVG                                      | OP | 206.210 | 1848.83 | 561.30  | 4  | 21.30 | No Fit | 0          | 0          | 0           |             |              |               |                |
|                                            | 2P |         |         |         |    |       | No Fit | 0          | 0          | 0           |             |              |               |                |
| CIMAE                                      | OP | 211.215 | 560.30  | 566.23  | 4  | 25.10 | No Fit | 0          | 0          | 0           |             |              |               |                |
|                                            | 2P |         |         |         |    |       | No Fit | 0          | 0          | 0           |             |              |               |                |
| AELLTGRTLFPGTDHIDQ                         | OP | 214.231 | 565.23  | 662.00  | 16 | 33.40 | 3.12   | 3.09(.51)  | 5.31(.32)  |             | 8.41(.26)   | 16.24(9.38)  | 0.077(.014)   |                |
|                                            | 2P |         |         |         |    |       | 2.10   | 2.39(.37)  | 2.39(.47)  | 5.40(1.39)  | 10.16(1.71) | 11.03(4.94)  | 0.22(.12)     | 0.0065(.0044)  |

|                                       |    |         |         |         |    |       |        |            |            |            |             |              |              |               |
|---------------------------------------|----|---------|---------|---------|----|-------|--------|------------|------------|------------|-------------|--------------|--------------|---------------|
| AELLTGRTLFPGTDHIDQLKL <sup>(3)</sup>  | 0P | 214.234 | 1983.01 | 585.32  | 19 | 28.30 | 1.41   | 2.49(.43)  | 3.45(.62)  | 5.06(.54)  | 11          | 20.96(19.39) | 0.29(.12)    | 0.017(.0070)  |
|                                       | 2P |         |         |         |    |       | 3.80   | 3.63(.38)  |            | 6.83(.53)  | 10.47(.55)  | 2.98(.77)    |              | 0.014(.0033)  |
| LLTGRTLFPGTDHIDQLKL <sup>(3)</sup>    | 0P | 216.234 | 2337.27 | 713.38  | 17 | 30.20 | 3.27   | 2.65(.54)  | 4.56(.76)  | 3.79(.72)  | 11.0        | 19.21(17.71) | 0.20(.073)   | 0.010(.0073)  |
|                                       | 2P |         |         |         |    |       | 4.74   | 3.49(.41)  | 7.38(.60)  |            | 10.87(.65)  | 2.72(.79)    | 0.013(.0030) |               |
| LLTGRTLFPGTDHIDQLKLIL                 | 0P | 216.236 | 2137.13 | 788.79  | 19 | 28.10 | 4.47   | 3.32(.61)  | 7.13(.39)  |            | 10.45(.33)  | 10.08(4.03)  | 0.049(.0081) |               |
|                                       | 2P |         |         |         |    |       | 2.87   | 3.12(.33)  | 7.00(.39)  |            | 10.13(.39)  | 4.20(1.08)   | 0.016(.0029) |               |
| LTGRTLFPGTDHIDQLKL                    | 0P | 217.234 | 2363.36 | 675.70  | 16 | 30.70 | 1.30   | 2.49(.45)  | 2.82(.67)  | 4.66(.70)  | 9.97(.23)   | 16.96(11.32) | 0.38(.20)    | 0.027(.010)   |
|                                       | 2P |         |         |         |    |       | 0.88   | 1.84(.33)  | 2.38(.29)  | 6.25(.49)  | 10.47(.57)  | 18.96(16.35) | 0.62(.19)    | 0.0086(.0019) |
| LTGRTLFPGTDHIDQLKLIL                  | 0P | 217.236 | 2024.11 | 751.09  | 18 | 28.40 | 2.89   | 3.02(.49)  | 6.25(.31)  |            | 9.30(.26)   | 10.76(4.06)  | 0.061(.0091) |               |
|                                       | 2P |         |         |         |    |       | 3.61   | 2.89(.36)  | 6.00(.39)  |            | 9.05(.38)   | 4.39(1.32)   | 0.018(.0035) |               |
| ILRL <sup>(4)</sup>                   | 0P | 235.238 | 2250.28 | 514.37  | 3  | 31.20 | No Fit | 0          | 0          | 0          |             |              |              |               |
|                                       | 2P |         |         |         |    |       | No Fit | 0          | 0          | 0          |             |              |              |               |
| ILRLVGTPGAE                           | 0P | 235.245 | 513.37  | 563.33  | 9  | 24.80 | 0.25   | 3.61(.19)  | 0.73(.15)  | 1.62(.65)  | 5.96(.72)   | 23.03(7.82)  | 0.44(.26)    | 0.0063(.0055) |
|                                       | 2P |         |         |         |    |       | 1.29   | 3.74(.21)  |            | 2.55(1.10) | 6.30(1.13)  | 15.70(3.91)  |              | .0058(.0044)  |
| ILRLVGTPGAEL <sup>(3)</sup>           | 0P | 235.246 | 1124.66 | 619.87  | 10 | 27.40 | 0.20   | 4.43(.17)  | 1.37(.15)  | 1.13(.21)  | 6.93(.26)   | 20.67(4.04)  | 0.40(.12)    | 0.011(.0079)  |
|                                       | 2P |         |         |         |    |       | 0.67   | 4.29(.19)  | 1.25(.20)  | 1.47(.20)  | 7.0         | 14.47(2.40)  | 0.17(.078)   | 0.0060(.0018) |
| ILRLVGTPGAELKKISSESARN                | 0P | 235.257 | 1237.74 | 818.14  | 21 | 27.10 | 4.04   | 13.71(.76) | 5.36(.54)  |            | 19.06(.21)  | 24.86(10.02) | 0.58(.15)    |               |
|                                       | 2P |         |         |         |    |       | 7.68   | 14.90(.77) | 4.55(.61)  |            | 19.46(.26)  | 15.62(3.14)  | 0.39(.15)    |               |
| RLVGTPGAEL                            | 0P | 237.246 | 2451.42 | 506.79  | 8  | 24.40 | 0.41   | 4.85(.19)  | 1.67(.11)  |            | 6.51(.10)   | 17.79(2.68)  | 0.063(.013)  |               |
|                                       | 2P |         |         |         |    |       | 0.77   | 4.68(.17)  | 1.65(.14)  |            | 6.33(.12)   | 14.90(2.22)  | 0.045(.011)  |               |
| RLVGTPGAELKKISSESARN                  | 0P | 237.257 | 1011.57 | 742.75  | 19 | 27.60 | 4.04   | 13.70(.76) | 5.36(.54)  |            | 19.06(.21)  | 24.90(10.42) | 0.59(.15)    |               |
|                                       | 2P |         |         |         |    |       | 3.93   | 13.96(.90) | 4.38(.82)  | 2.00(.52)  | 20.33(.47)  | 19.13(5.41)  | 0.93(.36)    | 0.018(.018)   |
| VGTPGAEL                              | 0P | 239.246 | 2225.25 | 743.39  | 6  | 24.40 | 0.58   | 4.19(.22)  | 0.59(.13)  |            | 4.77(.11)   | 20.65(5.70)  | 0.12(.086)   |               |
|                                       | 2P |         |         |         |    |       | 1.03   | 4.11(.20)  | 0.59(.15)  |            | 4.69(.12)   | 16.55(3.84)  | 0.080(.065)  |               |
| VGTPGAELKKISSESARN                    | 0P | 239.257 | 742.39  | 653.02  | 17 | 27.00 | 0.85   | 13.97(.67) | 3.20(.63)  | 1.05(.62)  | 18.21(.14)  | 21.69(4.49)  | 1.47(.64)    | 0.12(.11)     |
|                                       | 2P |         |         |         |    |       | 2.25   | 13.78(.86) | 3.30(.78)  | 1.30(.41)  | 18.37(.23)  | 17.99(3.90)  | 1.31(.56)    | 0.037(.029)   |
| VGTPGAELKKISSESARNYIQL <sup>(7)</sup> | 0P | 239.262 | 1956.06 | 854.46  | 22 | 32.20 | 8.52   | 7.31(.84)  | 8.41(.53)  |            | 15.71(.45)  | 16.15(6.23)  | 0.045(.0087) |               |
|                                       | 2P |         |         |         |    |       | 6.99   | 8.12(.17)  | 7.81(.044) |            | 15.93(.048) | 16.20(0.00)  | 0.011(.0002) |               |
| LLKKISSESARNYIQL                      | 0P | 246.262 | 2560.39 | 975.55  | 16 | 22.10 | 9.80   | 15.86(.83) |            |            | 15.98(.22)  | 12.00(1.51)  |              |               |
|                                       | 2P |         |         |         |    |       | 5.86   | 14.46(.78) | 2.41(.63)  |            | 16.86(.31)  | 11.59(1.74)  | 0.33(.25)    |               |
| LKKISSESARN <sup>(3)</sup>            | 0P | 247.257 | 1949.09 | 616.84  | 10 | 23.10 | 1.82   | 7.77(.43)  | 1.22(.14)  |            | 9.0         | 16.12(4.70)  | 0.013(.0095) |               |
|                                       | 2P |         |         |         |    |       | 2.19   | 6.92(.76)  | 1.77(.70)  |            | 8.69(.15)   | 19.31(9.84)  | 0.96(.59)    |               |
| LKKISSESARNYIQL                       | 0P | 247.262 | 1231.68 | 919.01  | 15 | 26.90 | 0.89   | 12.96(.57) | 2.56(.50)  |            | 15.52(.088) | 18.85(2.97)  | 1.35(.37)    |               |
|                                       | 2P |         |         |         |    |       | 3.47   | 12.80(.78) | 2.92(.70)  |            | 15.71(.15)  | 13.18(2.18)  | 0.73(.34)    |               |
| YIQL <sup>(3)</sup>                   | 0P | 258.262 | 622.34  | 623.34  | 4  | 22.90 | 0.24   | 2.27(.14)  | 0.36(.089) |            | 2.63(.076)  | 15.71(3.21)  | 0.046(.034)  |               |
|                                       | 2P |         |         |         |    |       | 0.63   | 2.24(.14)  |            | 0.77(.058) | 3.0         | 8.68(1.44)   |              | 0.0032(.0015) |
| AQMPKMN                               | 0P | 263.270 | 965.45  | 483.72  | 6  | 33.10 | 0.63   | 4.87(.32)  | 1.41(.25)  |            | 6.28(.072)  | 20.29(6.37)  | 0.71(.26)    |               |
|                                       | 2P |         |         |         |    |       | 1.03   | 5.11(.30)  | 1.26(.24)  |            | 6.35(.089)  | 10.50(1.57)  | 0.38(.20)    |               |
| AQMPKMNANV                            | 0P | 263.273 | 1249.59 | 625.80  | 9  | 28.90 | 0.66   | 7.02(.30)  | 2.24(.21)  |            | 9.35(.088)  | 14.92(1.95)  | 0.42(.11)    |               |
|                                       | 2P |         |         |         |    |       | 1.36   | 7.02(.31)  | 2.42(.24)  |            | 9.43(.12)   | 10.95(1.36)  | 0.30(.092)   |               |
| AQMPKMNANVNF                          | 0P | 263.274 | 1396.66 | 699.33  | 10 | 31.00 | 0.47   | 6.85(.27)  | 3.75(.19)  |            | 10.60(.070) | 21.56(4.58)  | 0.60(.074)   |               |
|                                       | 2P |         |         |         |    |       | 1.70   | 6.36(.62)  | 3.34(.59)  | 1.35(.46)  | 11.05(.20)  | 14.28(3.95)  | 0.82(.32)    | 0.041(.029)   |
| AQMPKMNANVFIGANPLAVDL                 | 0P | 263.284 | 2360.19 | 1181.10 | 19 | 29.80 | 1.33   | 9.54(1.01) | 6.45(.93)  |            | 15.98(.14)  | 18.66(7.49)  | 0.66(.19)    |               |
|                                       | 2P |         |         |         |    |       | 8.31   | 7.81(1.52) | 7.96(1.35) |            | 15.76(.41)  | 16.52(11.72) | 0.67(.25)    |               |
| ANV                                   | 0P | 271.274 | 449.23  | 450.23  | 3  | 20.60 | 1.32   |            | 2.33(.11)  |            | 2.33(.20)   |              | 0.65(.15)    |               |
|                                       | 2P |         |         |         |    |       | 0.58   | 1.56(.35)  | 0.75(.31)  |            | 2.37(.09)   | 0.94(.33)    | 0.074(.060)  |               |
| IGANPLAVDL                            | 0P | 275.284 | 981.56  | 982.56  | 8  | 26.00 | 0.23   | 1.36(.19)  | 1.56(.13)  |            | 2.93(.05)   | 14.07(5.55)  | 0.47(.11)    |               |
|                                       | 2P |         |         |         |    |       | 0.57   | 1.07(.27)  | 1.93(.24)  |            | 2.99(.06)   | 10.39(6.23)  | 0.53(.15)    |               |
| IGANPLAVDLLEKM                        | 0P | 275.288 | 1482.81 | 742.41  | 12 | 31.00 | 0.75   |            | 2.15(.15)  |            | 2.15(.078)  |              | 0.87(.15)    |               |
|                                       | 2P |         |         |         |    |       | 1.02   |            | 2.54(.14)  |            | 2.54(.082)  |              | 0.80(.12)    |               |
| LEKMLVLDSDKRITAAQALAHAY               | 0P | 285.307 | 2556.37 | 853.12  | 22 | 26.10 | 0.42   | 3.60(.26)  | 3.69(.50)  | 3.45(.54)  | 10.73(.11)  | 18.67(5.71)  | 0.40(.098)   | 0.041(.011)   |
|                                       | 2P |         |         |         |    |       | 5.53   | 4.53(.50)  | 6.27(.39)  |            | 10.84(.30)  | 7.21(1.95)   | 0.067(.013)  |               |

|                                    |    |         |         |         |    |       |        |            |            |            |             |              |              |                |
|------------------------------------|----|---------|---------|---------|----|-------|--------|------------|------------|------------|-------------|--------------|--------------|----------------|
| LVLDSDKRITAAQALAHAY <sup>(3)</sup> | 0P | 289.307 | 2055.12 | 1028.56 | 18 | 27.30 | 0.47   | 3.38(.26)  | 3.60(.76)  | 3.11(.81)  | 10.09(.12)  | 19.66(6.94)  | 0.33(.10)    | 0.044(.016)    |
|                                    | 2P |         |         |         |    |       | 1.47   | 2.86(.42)  | 3.84(.39)  | 4.30(.35)  | 11.0        | 21.10(17.79) | 0.56(.15)    | 0.017(.0047)   |
| LVLDSDKRITAAQALAHAYF               | 0P | 289.308 | 2202.19 | 735.06  | 19 | 28.80 | 2.46   | 3.68(.46)  | 6.18(.28)  |            | 9.87(.22)   | 16.74(7.67)  | 0.11(.015)   |                |
|                                    | 2P |         |         |         |    |       | 1.42   | 2.85(.42)  | 3.41(.36)  | 4.57(.31)  | 10.83(.21)  | 21.46(18.71) | 0.71(.21)    | 0.025(.0051)   |
| DSDKRITAAQALAHAY                   | 0P | 292.307 | 1729.87 | 865.94  | 15 | 21.80 | 0.76   | 2.09(.27)  | 4.36(.16)  |            | 6.46(.12)   | 9.30(2.47)   | 0.10(.011)   |                |
|                                    | 2P |         |         |         |    |       | 2.93   | 3.09(.37)  | 3.62(.39)  |            | 7.09(.34)   | 1.11(.29)    | 0.019(.0063) |                |
| FAQYHDPDDEPVADPYDQSF               | 0P | 308.327 | 2354.97 | 1178.49 | 16 | 30.00 | 2.15   | 6.73(.46)  | 3.81(.27)  |            | 10.54(.18)  | 19.44(6.14)  | 0.23(.054)   |                |
|                                    | 2P |         |         |         |    |       | 6.16   | 7.24(.51)  | 3.82(.38)  |            | 11.06(.29)  | 10.14(2.03)  | 0.079(.025)  |                |
| AQYHDPDDEPVADPYDQSF <sup>(3)</sup> | 0P | 309.327 | 2207.90 | 1104.95 | 15 | 30.80 | 1.58   | 6.14(.38)  | 3.50(.22)  |            | 9.64(.14)   | 16.89(3.91)  | 0.23(.048)   |                |
|                                    | 2P |         |         |         |    |       | 2.62   | 3.36(.59)  | 2.28(.52)  |            | 10.5        | 0.83(.34)    | 0.026(.012)  |                |
| FESRDLL <sup>(3)</sup>             | 0P | 327.333 | 878.45  | 879.45  | 6  | 27.60 | 0.57   | 0.73(.27)  | 2.61(.21)  | 2.18(.20)  | 5.5         | 7.80(5.78)   | 0.26(.070)   | 0.0052(.0011)  |
|                                    | 2P |         |         |         |    |       | 0.80   |            | 1.45(.17)  | 3.67(1.55) | 5.13(1.63)  |              | 0.78(.22)    | 0.0045(.0033)  |
| ESRDLL                             | 0P | 328.333 | 731.39  | 732.39  | 5  | 29.80 | 0.65   | 2.45(.25)  | 1.30(.16)  |            | 3.77(.12)   | 9.70(2.20)   | 0.082(.030)  |                |
|                                    | 2P |         |         |         |    |       | 1.19   | 1.97(.25)  | 1.50(.19)  |            | 3.47(.12)   | 8.46(2.71)   | 0.16(.064)   |                |
| ESRDLLIDE                          | 0P | 328.336 | 1088.54 | 545.27  | 8  | 26.10 | 0.63   | 3.18(.26)  | 1.66(.16)  |            | 4.84(.098)  | 9.81(1.75)   | 0.23(.071)   |                |
|                                    | 2P |         |         |         |    |       | 2.28   | 3.25(.34)  | 1.82(.30)  |            | 5.06(.18)   | 4.31(1.07)   | 0.090(.040)  |                |
| LLIDE <sup>(3)</sup>               | 0P | 332.336 | 601.33  | 602.33  | 4  | 23.90 | 1.08   | 1.48(.26)  |            | 0.64(.086) | 2.25        | 5.66(1.89)   |              | 0.0032(.0025)  |
|                                    | 2P |         |         |         |    |       | 1.94   | 1.67(.22)  |            | 1.07(.12)  | 2.75        | 2.72(.85)    |              | 0.0042(.0017)  |
| IDEWKSLT <sup>(3)</sup>            | 0P | 334.341 | 990.50  | 496.25  | 7  | 25.60 | 0.30   | 0.26(.13)  | 0.92(.22)  |            | 1.19(.25)   | 1.98(2.11)   | 0.011(.0078) |                |
|                                    | 2P |         |         |         |    |       | 0.24   | 0.30(.085) |            | 1.28(.065) | 1.5         | 0.97(.66)    |              | 0.0052(.00068) |
| IDEWKSPTYDEV                       | 0P | 334.345 | 1496.70 | 749.35  | 11 | 28.30 | 0.393  |            | 1.55(.11)  |            | 1.28(.11)   |              | 0.025(.0066) |                |
|                                    | 2P |         |         |         |    |       | 0.83   |            | 1.29(.26)  |            | .98(.26)    |              | 0.013(.0072) |                |
| WKSPTYD <sup>(4)</sup>             | 0P | 337.343 | 911.45  | 456.73  | 6  | 25.00 | No Fit | 0          | 0          | 0          |             |              |              |                |
|                                    | 2P |         |         |         |    |       | No Fit | 0          | 0          | 0          |             |              |              |                |
| WKSPTYDE <sup>(4)</sup>            | 0P | 337.344 | 1040.48 | 521.24  | 7  | 24.50 | No Fit | 0          | 0          | 0          |             |              |              |                |
|                                    | 2P |         |         |         |    |       | No Fit | 0          | 0          | 0          |             |              |              |                |
| WKSPTYDEV <sup>(4)</sup>           | 0P | 337.345 | 1139.55 | 570.77  | 8  | 27.20 | No Fit | 0          | 0          | 0          |             |              |              |                |
|                                    | 2P |         |         |         |    |       | No Fit | 0          | 0          | 0          |             |              |              |                |
| EVSIF                              | 0P | 344.348 | 593.31  | 594.31  | 4  | 20.40 | 0.27   | 0.53(.20)  | 1.14(.20)  |            | 1.68(.07)   | 2.33(1.87)   | 0.13(.045)   |                |
|                                    | 2P |         |         |         |    |       | 0.62   | 0.54(.24)  | 1.15(.23)  |            | 1.59(.12)   | 0.95(.80)    | 0.036(.019)  |                |
| EVSIFVPPPLDQEE                     | 0P | 344.357 | 1597.80 | 799.90  | 10 | 29.00 | 0.69   | 5.40(.23)  | 2.76(.125) |            | 8.16(.10)   | 25.08(8.35)  | 0.11(.016)   |                |
|                                    | 2P |         |         |         |    |       | 3.58   | 5.69(.34)  | 2.52(.23)  |            | 8.24(.17)   | 14.20(3.30)  | 0.051(.015)  |                |
| ISFVPPPLDQEEMES                    | 0P | 346.360 | 1716.79 | 859.40  | 11 | 29.90 | 0.67   | 8.00(.30)  | 2.60(.21)  |            | 10.60(.085) | 24.35(6.64)  | 0.54(.11)    |                |
|                                    | 2P |         |         |         |    |       | 2.11   | 8.26(.36)  | 2.60(.26)  |            | 10.87(.15)  | 14.80(2.45)  | 0.27(.086)   |                |
| VPPPLDQEEMES                       | 0P | 349.360 | 1369.61 | 685.80  | 8  | 27.20 | 2.12   | 8.56(.36)  |            |            | 8.57(.087)  | 15.76(2.13)  |              |                |
|                                    | 2P |         |         |         |    |       | 1.86   | 8.29(.25)  |            |            | 8.29(.085)  | 15.96(2.12)  |              |                |

Footnotes:

- (1) Information for each peptide includes Amino acid sequence, Residue numbers, Calculated mass, Observed mass/charge, Number of exchangeable amides (#EA), Percent back-exchange (%BE), and Residual sum of squares for best NLSQ fit (RSS)
- (2) A, B, and C equal the number of amides exchanging with rates  $k_1$ ,  $k_2$ , and  $k_3$  respectively. N equals A+B+C.  
Values are corrected for artifactual in-exchange, back-exchange, and percentage D2O during the incubation.
- (3) Fitting constrained N to equal deuteration at 4hrs.
- (4) Peptides with "No Fit" -- Fitting failed to converge because no measurable hydrogen exchange could be observed over the 4 h time course.
- (5) In nine peptides around the activation lip, differential proteolysis was observed between 0P-p38 and 2P-p38 (See Figure 2).  
For these peptides, only one activation state is listed. Peptide 173-187 is the only peptide observed in 2P-p38.
- (6) Peptide 173-187 was not observed in 0P-p38. Instead the fit represents deuteration vs time summed over peptides 173-182 and 183-187 in 0p-p38.
- (7) Rates were fixed to predicted values to better allow model convergence.



**Suppl. Table 3: Hydrogen exchange error measurements.**

Standard deviations of weighted average mass and number of  
were quantified at the 1 min time point in three replicate runs,

|                                                           | <b>0p-p38<math>\alpha</math></b> | <b>2p-p38<math>\alpha</math></b> |
|-----------------------------------------------------------|----------------------------------|----------------------------------|
| Avg Std Dev of the Weighted Average Mass (WAM)            | 0.0400                           | 0.0482                           |
| Lowest value                                              | 0.0075                           | 0.0004                           |
| Highest value                                             | 0.0985                           | 0.1329                           |
| Avg Std Dev of the Number of Deuterons Incorporated (#DI) | 0.1611                           | 0.1856                           |
| Lowest value                                              | 0.0292                           | 0.0025                           |
| Highest value                                             | 0.3318                           | 0.4175                           |

| <b>Peptide Name (Starting Residue.Final Residue)</b> | <b>0p-p38<math>\alpha</math> WAM</b> | <b>#DI</b>                    | <b>WAM Avg</b> | <b>WAM Stdev</b> | <b>#DI Avg</b> |
|------------------------------------------------------|--------------------------------------|-------------------------------|----------------|------------------|----------------|
| -7.8                                                 | 975.5114<br>975.6326<br>975.5112     | 6.8661<br>7.2467<br>6.8656    | 975.5517       | 0.0701           | 6.9928         |
| 9.39                                                 | 1181.6976<br>1181.7701<br>1181.7048  | 19.9505<br>20.3082<br>19.9861 | 1181.7338      | 0.0513           | 20.0816        |
| 40.71                                                | 931.0292<br>931.0452<br>930.9977     | 7.9017<br>8.0108<br>7.6861    | 931.0240       | 0.0241           | 7.8662         |
| 72.86                                                | 601.9295<br>602.0059<br>602.0420     | 0.7850<br>1.1965<br>1.3907    | 601.9925       | 0.0575           | 1.1241         |
| 72.87                                                | 639.6334<br>639.6806<br>639.7200     | 1.1305<br>1.4510<br>1.7182    | 639.6780       | 0.0433           | 1.4332         |
| 75.87                                                | 512.0194<br>512.0908<br>512.0607     | 1.1601<br>1.4972<br>1.3551    | 512.0570       | 0.0359           | 1.3375         |
| 83.94                                                | 474.4170<br>474.3914<br>474.4678     | 1.3315<br>1.2004<br>1.5911    | 474.4254       | 0.0389           | 1.3743         |
| 83.96                                                | 550.3859<br>550.4467                 | 0.7768<br>1.0866              | 550.4163       | 0.0430           | 0.9317         |
| 87.103                                               | 1011.2675<br>1011.1381               | 7.5772<br>7.2779              | 1011.2019      | 0.0647           | 7.4255         |

|         |           |         |          |        |         |
|---------|-----------|---------|----------|--------|---------|
|         | 1011.2002 | 7.4214  |          |        |         |
| 87.98   | 690.7697  | 4.1878  | 690.7432 | 0.0278 | 4.1045  |
|         | 690.7142  | 4.0133  |          |        |         |
|         | 690.7457  | 4.1124  |          |        |         |
| 88.98   | 634.2042  | 4.2581  | 634.1481 | 0.0780 | 4.0778  |
|         | 634.1811  | 4.1838  |          |        |         |
|         | 634.0589  | 3.7916  |          |        |         |
| 88.103  | 954.6470  | 7.6866  | 954.6292 | 0.0382 | 7.6269  |
|         | 954.5853  | 7.4800  |          |        |         |
|         | 954.6552  | 7.7141  |          |        |         |
| 87.99   | 764.7014  | 5.3980  | 764.6906 | 0.0183 | 5.3629  |
|         | 764.6695  | 5.2944  |          |        |         |
|         | 764.7009  | 5.3963  |          |        |         |
| 87.101  | 879.8378  | 6.7894  | 879.8822 | 0.0599 | 6.9585  |
|         | 879.8584  | 6.8677  |          |        |         |
|         | 879.9503  | 7.2184  |          |        |         |
| 89.98   | 576.3927  | 3.5194  | 576.4166 | 0.0214 | 3.5901  |
|         | 576.4233  | 3.6099  |          |        |         |
|         | 576.4338  | 3.6410  |          |        |         |
| 99.104  | 771.2564  | 0.5270  | 771.2529 | 0.0320 | 0.5217  |
|         | 771.2193  | 0.4701  |          |        |         |
|         | 771.2831  | 0.5679  |          |        |         |
| 104.129 | 989.3288  | 17.0222 | 989.3628 | 0.0426 | 17.1898 |
|         | 989.3490  | 17.1216 |          |        |         |
|         | 989.4106  | 17.4255 |          |        |         |
| 130.156 | 799.2060  | 1.1222  | 799.1963 | 0.0205 | 1.0560  |
|         | 799.1729  | 0.8954  |          |        |         |
|         | 799.1755  | 0.9134  |          |        |         |
|         | 799.2131  | 1.1706  |          |        |         |
|         | 799.2143  | 1.1785  |          |        |         |
| 130.145 | 635.6696  | 0.1323  | 635.6768 | 0.0075 | 0.1678  |
|         | 635.6762  | 0.1649  |          |        |         |
|         | 635.6846  | 0.2062  |          |        |         |
| 131.156 | 770.8719  | 1.0027  | 770.8583 | 0.0163 | 0.9115  |
|         | 770.8402  | 0.7913  |          |        |         |
|         | 770.8626  | 0.9406  |          |        |         |
| 133.145 | 758.1533  | 0.1180  | 758.2295 | 0.0709 | 0.3533  |
|         | 758.2417  | 0.3910  |          |        |         |
|         | 758.2935  | 0.5509  |          |        |         |

|         |                                  |                               |          |        |         |
|---------|----------------------------------|-------------------------------|----------|--------|---------|
| 133.156 | 935.3501<br>935.3937<br>935.3887 | 0.8247<br>1.0473<br>1.0215    | 935.3775 | 0.0238 | 0.9645  |
| 134.156 | 892.5834<br>892.6032<br>892.6475 | 0.9077<br>1.0045<br>1.2213    | 892.6113 | 0.0328 | 1.0445  |
| 136.156 | 817.2136<br>817.2742<br>817.2850 | 1.0455<br>1.3505<br>1.4051    | 817.2576 | 0.0385 | 1.2670  |
| 157.164 | 894.2474<br>894.2404<br>894.2935 | 1.4788<br>1.4670<br>1.5574    | 894.2604 | 0.0288 | 1.5011  |
| 164.182 | 735.2982<br>735.3815<br>735.4271 | 10.7872<br>11.2016<br>11.4288 | 735.3689 | 0.0654 | 11.1392 |
| 165.187 |                                  |                               |          |        |         |
| 183.194 | 499.5577<br>499.6129             | 4.7043<br>4.9864              | 499.5853 | 0.0390 | 4.8453  |
| 188.195 | 497.8511<br>497.9184             | 2.2556<br>2.4821              | 497.8848 | 0.0476 | 2.3688  |
| 195.210 | 984.9019<br>984.7267<br>984.7955 | 6.6966<br>6.1154<br>6.3439    | 984.8080 | 0.0883 | 6.3853  |
| 211.215 | 566.7938<br>566.7948<br>566.7613 | 0.1558<br>0.1574<br>0.1061    | 566.7833 | 0.0190 | 0.1398  |
| 214.231 | 663.3316<br>663.3425<br>663.3810 | 3.2657<br>3.3177<br>3.5024    | 663.3517 | 0.0259 | 3.3620  |
| 214.234 | 586.3834<br>586.3903<br>586.4037 | 3.2904<br>3.3346<br>3.4207    | 586.3924 | 0.0103 | 3.3486  |
| 216.234 | 714.7342<br>714.7819             | 3.4077<br>3.6434              | 714.7760 | 0.0391 | 3.6141  |

|         |           |         |           |        |         |
|---------|-----------|---------|-----------|--------|---------|
|         | 714.8118  | 3.7913  |           |        |         |
| 216.236 | 790.2317  | 3.5639  | 790.2200  | 0.0103 | 3.5083  |
|         | 790.2123  | 3.4716  |           |        |         |
|         | 790.2160  | 3.4893  |           |        |         |
| 217.234 | 677.0511  | 3.3576  | 677.0785  | 0.0298 | 3.4957  |
|         | 677.0740  | 3.4733  |           |        |         |
|         | 677.1102  | 3.6560  |           |        |         |
| 217.236 | 752.4612  | 3.3664  | 752.4476  | 0.0354 | 3.3016  |
|         | 752.4075  | 3.1099  |           |        |         |
|         | 752.4742  | 3.4285  |           |        |         |
| 235.257 | 822.3861  | 16.3017 | 822.3929  | 0.0291 | 16.3336 |
|         | 822.3678  | 16.2161 |           |        |         |
|         | 822.4248  | 16.4831 |           |        |         |
| 275.288 | 743.4816  | 0.9562  | 743.5069  | 0.0220 | 1.0425  |
|         | 743.5205  | 1.0886  |           |        |         |
|         | 743.5187  | 1.0826  |           |        |         |
| 285.307 | 854.9129  | 4.8517  | 854.9181  | 0.0183 | 4.8752  |
|         | 854.9030  | 4.8062  |           |        |         |
|         | 854.9384  | 4.9676  |           |        |         |
| 289.308 | 736.5762  | 4.1568  | 736.5969  | 0.0462 | 4.2549  |
|         | 736.6498  | 4.5059  |           |        |         |
|         | 736.5646  | 4.1019  |           |        |         |
| 308.327 | 1181.7384 | 7.2754  | 1181.7690 | 0.0985 | 7.3782  |
|         | 1181.6894 | 7.1101  |           |        |         |
|         | 1181.8791 | 7.7492  |           |        |         |
| 327.333 | 881.0849  | 1.3532  | 881.0361  | 0.0423 | 1.2742  |
|         | 881.0103  | 1.2323  |           |        |         |
|         | 881.0132  | 1.2370  |           |        |         |
| 346.360 | 862.7988  | 8.9223  | 862.8112  | 0.0670 | 8.9639  |
|         | 862.7512  | 8.7619  |           |        |         |
|         | 862.8835  | 9.2073  |           |        |         |

deuterons incorporated  
performed for 0P-p38 and 2P-p38.

| #DI StDev | 2p-p38α<br>WAM                      | #DI                           | WAM Avg   | WAM Stdev | #DI Avg | #DI StDev |
|-----------|-------------------------------------|-------------------------------|-----------|-----------|---------|-----------|
| 0.2199    | 975.6623<br>975.6760<br>975.6319    | 7.2881<br>7.3313<br>7.1921    | 975.6567  | 0.0226    | 7.2705  | 0.0713    |
| 0.1970    | 1181.9660<br>1181.9635<br>1181.9297 | 21.2151<br>21.2024<br>21.0352 | 1181.9647 | 0.0018    | 21.1509 | 0.1004    |
| 0.1652    | 930.9845<br>930.9587<br>930.9422    | 7.5647<br>7.3881<br>7.2750    | 930.9618  | 0.0213    | 7.4093  | 0.1460    |
| 0.3093    | 601.9860<br>601.9841<br>601.9388    | 1.0103<br>1.0001<br>0.7552    | 601.9696  | 0.0267    | 0.9219  | 0.1444    |
| 0.2943    | 639.6694<br>639.6004<br>639.6893    | 0.8936<br>0.4153<br>1.0308    | 639.6530  | 0.0467    | 0.7799  | 0.3232    |
| 0.1693    | 512.0706<br>512.0278<br>512.1320    | 1.3252<br>1.1221<br>1.6168    | 512.0768  | 0.0524    | 1.3547  | 0.2487    |
| 0.1988    | 474.3857<br>474.4271<br>474.4251    | 1.1712<br>1.3828<br>1.3728    | 474.4126  | 0.0233    | 1.3089  | 0.1194    |
| 0.2191    | 550.4448<br>550.4008<br>550.4467    | 1.2778<br>1.0565<br>1.2871    | 550.4308  | 0.0259    | 1.2071  | 0.1305    |
| 0.1497    | 1011.2070<br>1011.2904              | 7.4775<br>7.6714              | 1011.1836 | 0.1202    | 7.4231  | 0.2795    |

|        |                                  |                               |          |        |         |        |
|--------|----------------------------------|-------------------------------|----------|--------|---------|--------|
|        | 1011.0533                        | 7.1204                        |          |        |         |        |
| 0.0876 | 690.7092<br>690.6380<br>690.6528 | 4.0439<br>3.8210<br>3.8674    | 690.6666 | 0.0376 | 3.9108  | 0.1176 |
| 0.2507 | 634.1769<br>634.1089<br>634.1697 | 4.0884<br>3.8676<br>4.0651    | 634.1518 | 0.0373 | 4.0070  | 0.1213 |
| 0.1279 | 954.4921<br>954.4579<br>954.4623 | 7.1638<br>7.0495<br>7.0642    | 954.4708 | 0.0186 | 7.0925  | 0.0622 |
| 0.0593 | 764.6694<br>764.6692<br>764.6006 | 5.2931<br>5.2924<br>5.0699    | 764.6464 | 0.0397 | 5.2185  | 0.1287 |
| 0.2285 | 879.8668<br>879.9132<br>879.7422 | 6.9483<br>7.1243<br>6.4753    | 879.8407 | 0.0884 | 6.8493  | 0.3356 |
| 0.0632 | 576.3813<br>576.5421<br>576.4797 | 3.2258<br>3.7222<br>3.5295    | 576.4677 | 0.0810 | 3.4925  | 0.2502 |
| 0.0492 | 771.3169<br>771.2671<br>771.2180 | 0.7048<br>0.6296<br>0.5553    | 771.2673 | 0.0495 | 0.6299  | 0.0748 |
| 0.2101 | 989.1552<br>989.1199<br>988.9937 | 16.2054<br>16.0319<br>15.4113 | 989.0896 | 0.0849 | 15.8829 | 0.4175 |
| 0.1402 | 799.3311<br>799.2590<br>799.2507 | 1.8397<br>1.3440<br>1.2868    | 799.2803 | 0.0443 | 1.4902  | 0.3041 |
| 0.0371 | 635.6646<br>635.6615<br>635.6848 | 0.0411<br>0.0255<br>0.1412    | 635.6703 | 0.0127 | 0.0692  | 0.0628 |
| 0.1087 | 770.8980<br>770.9212<br>770.8667 | 1.1977<br>1.3522<br>0.9886    | 770.8953 | 0.0274 | 1.1795  | 0.1825 |
| 0.2189 | 758.2012<br>758.1908<br>758.2141 | 0.0331<br>0.0004<br>0.0734    | 758.2021 | 0.0117 | 0.0356  | 0.0366 |

|        |                                  |                               |          |        |         |        |
|--------|----------------------------------|-------------------------------|----------|--------|---------|--------|
| 0.1217 | 935.4232<br>935.4050<br>935.4084 | 1.0149<br>0.9216<br>0.9389    | 935.4122 | 0.0097 | 0.9585  | 0.0496 |
| 0.1606 | 892.6682<br>892.5742<br>892.6551 | 1.1426<br>0.6795<br>1.0777    | 892.6325 | 0.0509 | 0.9666  | 0.2507 |
| 0.1938 | 817.2413<br>817.1907<br>817.2332 | 0.8967<br>0.6391<br>0.8559    | 817.2217 | 0.0272 | 0.7972  | 0.1384 |
| 0.0491 | 894.2446<br>894.2800<br>894.2958 | 1.5211<br>1.5811<br>1.6079    | 894.2735 | 0.0262 | 1.5700  | 0.0445 |
| 0.3253 |                                  |                               |          |        |         |        |
|        | 956.2982<br>956.2609<br>956.2054 | 14.4662<br>14.2890<br>14.0252 | 956.2548 | 0.0467 | 14.2601 | 0.2219 |
| 0.1995 |                                  |                               |          |        |         |        |
| 0.1601 | 497.6174<br>497.6345             | 1.5020<br>1.5589              | 497.6259 | 0.0120 | 1.5304  | 0.0403 |
| 0.2928 | 985.0036<br>985.1256             | 6.9274<br>7.3357              | 985.0646 | 0.0863 | 7.1316  | 0.2887 |
| 0.0292 | 567.0162<br>566.8553<br>566.7526 | 0.5454<br>0.3017<br>0.1461    | 566.8747 | 0.1329 | 0.3310  | 0.2013 |
| 0.1244 | 663.2650<br>663.1732<br>663.1878 | 2.8968<br>2.4551<br>2.5253    | 663.2087 | 0.0493 | 2.6257  | 0.2373 |
| 0.0662 | 586.3583<br>586.3578             | 3.1453<br>3.1418              | 586.3580 | 0.0004 | 3.1435  | 0.0025 |
| 0.1935 | 714.6492<br>714.6686             | 2.8975<br>2.9942              | 714.6394 | 0.0352 | 2.8488  | 0.1749 |

|        |           |         |           |        |         |        |
|--------|-----------|---------|-----------|--------|---------|--------|
|        | 714.6004  | 2.6547  |           |        |         |        |
| 0.0490 | 790.1954  | 3.2952  | 790.1735  | 0.0559 | 3.1903  | 0.2676 |
|        | 790.2151  | 3.3895  |           |        |         |        |
|        | 790.1099  | 2.8861  |           |        |         |        |
| 0.1505 | 676.9801  | 2.9418  | 676.9779  | 0.0122 | 2.9308  | 0.0616 |
|        | 676.9648  | 2.8644  |           |        |         |        |
|        | 676.9888  | 2.9861  |           |        |         |        |
| 0.1689 | 752.3919  | 2.8869  | 752.3671  | 0.0554 | 2.7676  | 0.2664 |
|        | 752.4057  | 2.9535  |           |        |         |        |
|        | 752.3036  | 2.4624  |           |        |         |        |
| 0.1363 | 822.4691  | 16.6695 | 822.4268  | 0.0520 | 16.4705 | 0.2440 |
|        | 822.4424  | 16.5438 |           |        |         |        |
|        | 822.3688  | 16.1982 |           |        |         |        |
| 0.0748 | 743.6893  | 1.7526  | 743.5843  | 0.1204 | 1.3976  | 0.4069 |
|        | 743.6106  | 1.4865  |           |        |         |        |
|        | 743.4529  | 0.9536  |           |        |         |        |
| 0.0832 | 854.9824  | 5.1637  | 854.9263  | 0.0542 | 4.9078  | 0.2475 |
|        | 854.9224  | 4.8899  |           |        |         |        |
|        | 854.8742  | 4.6697  |           |        |         |        |
| 0.2191 | 736.7041  | 4.7846  | 736.6670  | 0.0670 | 4.6092  | 0.3172 |
|        | 736.7073  | 4.8000  |           |        |         |        |
|        | 736.5897  | 4.2430  |           |        |         |        |
| 0.3318 | 1181.9674 | 8.0605  | 1181.9095 | 0.0666 | 7.8657  | 0.2241 |
|        | 1181.9244 | 7.9157  |           |        |         |        |
|        | 1181.8367 | 7.6207  |           |        |         |        |
| 0.0685 | 880.8066  | 0.9476  | 880.6988  | 0.1076 | 0.7740  | 0.1732 |
|        | 880.5914  | 0.6011  |           |        |         |        |
|        | 880.6983  | 0.7732  |           |        |         |        |
| 0.2256 | 862.9902  | 9.5628  | 862.8950  | 0.0826 | 9.2420  | 0.2782 |
|        | 862.8515  | 9.0953  |           |        |         |        |
|        | 862.8433  | 9.0678  |           |        |         |        |
